# Supplementary material
Source: PubMed Central journal article supplement (PMC5947942)
Supplement: EHP1691.s001.acco.pdf [file EHP1691.s001.acco.pdf]

**Note to readers with disabilities:** *EHP* strives to ensure that all journal content is accessible to all readers. However, some figures and Supplemental Material published in *EHP* articles may not conform to [508 standards](#) due to the complexity of the information being presented. If you need assistance accessing journal content, please contact [ehp508@niehs.nih.gov](mailto:ehp508@niehs.nih.gov). Our staff will work with you to assess and meet your accessibility needs within 3 working days.

## **Supplemental Material**

### **Early-Life Selenium Status and Cognitive Function at 5 and 10 Years of Age in Bangladeshi Children**

Helena Skröder, Maria Kippler, Fahmida Tofail, and Marie Vahter

#### **Table of Contents**

**Table S1.** Reference materials, recommended values and obtained values for selenium in blood and urine.

**Table S2.** Main characteristics of mothers and children included in the study, by urinary selenium at 5 (n=1234) and 10 years (n=1330) above and below spline knot at 34 µg/L.

**Figure S1.** Scatter plots with smoothed lowess lines for all outcomes at 5 and 10 years and erythrocyte selenium (Se; µg/g Hb) at gestational week 14.

**Figure S2.** Scatter plots with smoothed lowess lines for all outcomes at 5 and 10 years and urinary selenium (Se; µg/L) at 5 years. The vertical line at 34 µg/L represents the turning point used as the spline knot in the linear spline regression analyses.

**Figure S3.** Scatter plots with smoothed lowess lines for all outcomes at 10 years and urinary selenium (Se; µg/L) at 10 years. The vertical line at 34 µg/L represents the turning point used as the spline knot in the linear spline regression analyses.

**Figure S4.** Scatter plots with smoothed lowess lines for all outcomes at 10 years and hair selenium (Se; µg/kg) at 10 years. The vertical line at 665 µg/kg represents the turning point used as the spline knot in the linear spline regression analyses.

**Figure S5.** Estimates (B-coefficient) and 95% CI (straight line) for associations between all outcomes at 5 years and erythrocyte selenium (per 0.5 µg/g Hb) at gestational week 14, stratified by gender (n=608 girls and 652 boys). P-value for difference between estimates (Wald-test). Adjustments: parity and family SES at enrollment, birth weight, Hb at GW14, age at testing, HAZ, HOME, tester, school type, mothers' cognitive function, and paternal education (all assessed at 5 year follow-up).

**Supplemental Table S1.** Reference materials, recommended values and obtained values for selenium in blood and urine.

| Biomarker and time point                               | Reference material                                                 | N  | Recommended value<br>(mean $\pm$ SD; $\mu\text{g/kg}$ or L) | Obtained value<br>(mean $\pm$ SD; $\mu\text{g/kg}$ or L) |
|--------------------------------------------------------|--------------------------------------------------------------------|----|-------------------------------------------------------------|----------------------------------------------------------|
| Ery-Se ( $\mu\text{g/kg}$ )<br>GW14<br>(alkali method) | Seronorm <sup>TM</sup> Trace Elements Whole Blood L-1; LOT 1103128 | 70 | 59 $\pm$ 12                                                 | 55 $\pm$ 0.93                                            |
|                                                        | Seronorm <sup>TM</sup> Trace Elements Whole Blood L-2; LOT 1103129 | 69 | 112 $\pm$ 23                                                | 116 $\pm$ 2.2                                            |
| U-Se ( $\mu\text{g/L}$ )<br>5 years                    | Seronorm <sup>TM</sup> Trace Elements Urine Blank OK4636           | 63 | 22 $\pm$ 2.8                                                | 24 $\pm$ 1.9                                             |
|                                                        | Seronorm <sup>TM</sup> Trace Elements Urine NO2525                 | 66 | 67 $\pm$ 7.1                                                | 73 $\pm$ 4.6                                             |
|                                                        | NIST Standard reference material <sup>®</sup> 2670a                | 18 | 8 $\pm$ 3                                                   | 7.4 $\pm$ 1.3                                            |
| U-Se ( $\mu\text{g/L}$ )<br>10 years                   | Seronorm <sup>TM</sup> Trace Elements Urine 1011644                | 41 | 14 $\pm$ 2.8                                                | 15 $\pm$ 0.52                                            |
|                                                        | Seronorm <sup>TM</sup> Trace Elements Urine 1011645                | 39 | 70 $\pm$ 14                                                 | 74 $\pm$ 2.8                                             |
|                                                        | NIST Standard reference material <sup>®</sup> 2670a                | 5  | 8 $\pm$ 3                                                   | 7.8 $\pm$ 0.08                                           |

Abbreviations: Ery-Se, erythrocyte selenium; U-Se, urinary selenium

**Supplemental Table S2.** Main characteristics of mothers and children included in the study, by urinary selenium at 5 (n=1234) and 10 years (n=1330) above and below spline knot at 34 µg/L.

| Characteristic                 | U-Se <34 µg/L     | U-Se ≥ 34 µg/L  | p-value <sup>a</sup> | U-Se <34 µg/L      | U-Se ≥ 34 µg/L   | p-value <sup>a</sup> |
|--------------------------------|-------------------|-----------------|----------------------|--------------------|------------------|----------------------|
|                                | (5 years; n=1214) | (5 years; n=20) |                      | (10 years; n=1316) | (10 years; n=14) |                      |
|                                | Mean ± SD         | Mean ± SD       |                      | Mean ± SD          | Mean ± SD        |                      |
| <b>Mothers</b>                 |                   |                 |                      |                    |                  |                      |
| Parity at GW8 <sup>b</sup>     | 1.5 ± 1.4         | 1.4 ± 1.2       | 0.84                 | 1.5 ± 1.4          | 1.5 ± 1.7        | 0.81                 |
| SES at GW8                     | -0.15 ± 2.3       | -0.24 ± 2.1     | 0.71                 | -0.12 ± 2.3        | -0.47 ± 2.4      | 0.54                 |
| Ery-Se at GW14 (µg/g Hb)       | 0.45 ± 0.11       | 0.46 ± 0.12     | 0.69                 | 0.45 ± 0.11        | 0.45 ± 0.12      | 0.76                 |
| Ery-Zn at GW14 (µg/kg)         | 8123 ± 2327       | 8217 ± 1967     | 0.83                 | 8161 ± 2293        | 7237 ± 2379      | 0.22                 |
| Ery-Mn at GW14 (µg/kg)         | 20 ± 7.4          | 21 ± 5.9        | 0.18                 | 20 ± 7.5           | 18 ± 7.1         | 0.15                 |
| Ery-As at GW8 (µg/kg)          | 7.7 ± 8.3         | 6.5 ± 5.3       | 0.95                 | 7.5 ± 8.1          | 6.2 ± 7.1        | 0.41                 |
| Ery-Cd at GW8 (µg/kg)          | 1.1 ± 0.71        | 0.99 ± 0.52     | 0.99                 | 1.1 ± 0.69         | 0.76 ± 0.35      | 0.13                 |
| Ery-Pb at GW14 (µg/kg)         | 76 ± 44           | 89 ± 37         | 0.058                | 77 ± 45            | 76 ± 50          | 0.79                 |
| Raven's score at 5 years       | 25 ± 12           | 24 ± 11         | 0.72                 | 25 ± 12            | 25 ± 11          | 0.81                 |
| Education at 5 years (years)   | 4.6 ± 4.0         | 5.8 ± 3.4       | 0.14                 | 4.6 ± 4.0          | 4.4 ± 3.4        | 0.82                 |
| Education at 10 years          | 5.1 ± 3.7         | 5.9 ± 3.4       | 0.26                 | 5.2 ± 3.7          | 4.9 ± 3.2        | 0.81                 |
| Fathers education at 5 years   | 4.9 ± 4.5         | 6.0 ± 3.8       | 0.23                 | 5.1 ± 4.5          | 2.4 ± 3.2        | 0.026                |
| Fathers' education at 10 years | 5.3 ± 4.3         | 5.4 ± 3.9       | 0.93                 | 5.4 ± 4.3          | 3.3 ± 3.4        | 0.059                |

Online Supplemental Material

| <b>Children at birth</b>                                                   |                 |                |        |                 |                |       |
|----------------------------------------------------------------------------|-----------------|----------------|--------|-----------------|----------------|-------|
| Birth weight (g)                                                           | 2700 ± 390      | 2680 ± 510     | 0.97   | 2700 ± 390      | 2800 ± 287     | 0.37  |
| Gestational age at birth (weeks)                                           | 39 ± 2.1        | 39 ± 2.3       | 0.57   | 39 ± 2.1        | 39 ± 2.3       | 0.40  |
| <b>Children at 5 years</b>                                                 |                 |                |        |                 |                |       |
| Age (years)                                                                | 5.4 ± 0.13      | 5.4 ± 0.12     | 0.49   | 5.4 ± 0.13      | 5.4 ± 0.13     | 0.42  |
| HAZ (z-score)                                                              | -1.6 ± 0.92     | -1.4 ± 1.0     | 0.63   | -1.6 ± 0.92     | -1.7 ± 0.97    | 0.68  |
| HOME                                                                       | 8.5 ± 4.8       | 9.4 ± 5.1      | 0.42   | 8.6 ± 4.9       | 6.0 ± 2.9      | 0.048 |
| Tester (% children per tester)                                             | 8/77/15         | 0/75/25        | 0.27   | 8/78/14         | 7/71/21        | 0.61  |
| School type (%none/Primary/<br>Madrasa/Kindergarten/<br>Maktab/Non-formal) | 20/23/5/6/30/16 | 30/25/10/10/25 | 0.23   | 20/23/5/6/29/17 | 29/21/0/0/50/0 | 0.34  |
| U-Se (µg/L)                                                                | 13 ± 5.6        | 39 ± 7.5       | <0.001 | 14 ± 6.5        | 14 ± 4.7       | 0.45  |
| U-As (µg/L)                                                                | 101 ± 117       | 164 ± 236      | 0.25   | 102 ± 119       | 69 ± 57        | 0.56  |
| U-Cd (µg/L)                                                                | 0.28 ± 0.26     | 0.62 ± 0.75    | 0.039  | 0.29 ± 0.28     | 0.28 ± 0.17    | 0.70  |
| U-Pb (µg/L)                                                                | 4.6 ± 3.4       | 6.9 ± 9.0      | 0.044  | 4.6 ± 3.6       | 3.7 ± 1.7      | 0.51  |
| Full developmental score                                                   | 79 ± 22         | 82 ± 25        | 0.47   | 79 ± 22         | 67 ± 17        | 0.073 |
| Verbal score                                                               | 33 ± 11         | 33 ± 9.8       | 0.61   | 33 ± 11         | 27 ± 9.4       | 0.082 |
| Performance score                                                          | 34 ± 7.8        | 33 ± 8.3       | 0.44   | 34 ± 7.8        | 30 ± 9.2       | 0.11  |

Online Supplemental Material

| <b>Children at 10 years</b>                                 |              |              |        |               |             |        |
|-------------------------------------------------------------|--------------|--------------|--------|---------------|-------------|--------|
| Age (years)                                                 | 9.5 ± 0.095  | 9.5 ± 0.095  | 0.50   | 9.5 ± 0.095   | 9.5 ± 0.11  | 0.83   |
| HAZ (z-score)                                               | -1.4 ± 0.94  | -1.2 ± 1.1   | 0.35   | -1.4 ± 0.95   | -1.6 ± 0.84 | 0.53   |
| HOME                                                        | 27 ± 4.9     | 27 ± 4.6     | 0.74   | 27 ± 5.0      | 27 ± 6.0    | 0.92   |
| Tester (%children per tester)                               | 28/26/25/21  | 10/30/35/25  | 0.30   | 27/25/23/25   | 21/14/36/29 | 0.62   |
| School type (% none/madrasa/<br>NGO/primary/English medium) | 10/3/76/10/1 | 10/5/75/10/0 | 0.76   | <1/10/3/77/10 | 0/14/7/79/0 | 0.32   |
| Years of schooling                                          | 3.1 ± 1.0    | 3.3 ± 0.86   | 0.26   | 3.1 ± 1.0     | 2.9 ± 1.0   | 0.62   |
| SES                                                         | 0.0054 ± 2.6 | 0.34 ± 3.1   | 0.78   | 0.0056 ± 2.6  | -0.23 ± 2.7 | 0.83   |
| U-Se (µg/L)                                                 | 15 ± 6.1     | 18 ± 5.1     | 0.0032 | 14 ± 5.3      | 43 ± 8.9    | <0.001 |
| U-As (µg/L)                                                 | 108 ± 126    | 81 ± 77      | 0.42   | 107 ± 123     | 75 ± 39     | 0.71   |
| U-Cd (µg/L)                                                 | 0.29 ± 0.23  | 0.29 ± 0.16  | 0.62   | 0.29 ± 0.21   | 0.74 ± 0.66 | <0.001 |
| U-Pb (µg/L)                                                 | 1.9 ± 1.5    | 2.4 ± 3.4    | 0.69   | 1.9 ± 1.3     | 2.3 ± 1.5   | 0.14   |
| Hair Se (µg/kg)                                             | 487 ± 84     | 527 ± 91     | 0.029  | 487 ± 84      | 500 ± 93    | 0.58   |
| Hair Hg (µg/kg)                                             | 800 ± 513    | 879 ± 599    | 0.66   | 799 ± 686     | 836 ± 487   | 0.71   |
| Water Mn (µg/L)                                             | 909 ± 1187   | 1280 ± 1152  | 0.15   | 889 ± 1156    | 784 ± 851   | 0.90   |
| Full developmental score                                    | 133 ± 33     | 138 ± 28     | 0.32   | 133 ± 33      | 117 ± 23    | 0.052  |
| Verbal comprehension                                        | 37 ± 11      | 37 ± 9.7     | 0.72   | 37 ± 11       | 33 ± 6.5    | 0.14   |
| Perceptual reasoning                                        | 32 ± 12      | 35 ± 8.7     | 0.088  | 32 ± 12       | 26 ± 6.5    | 0.070  |
| Working memory                                              | 30 ± 6.1     | 30 ± 6.0     | 0.97   | 30 ± 6.2      | 27 ± 6.3    | 0.070  |
| Processing speed <sup>c</sup>                               | 34 ± 12      | 36 ± 13      | 0.66   | 34 ± 12       | 31 ± 11     | 0.35   |

Abbreviations: Ery-As, erythrocyte arsenic; Ery-Cd, erythrocyte cadmium; Ery-Mn, erythrocyte manganese; Ery-Pb, erythrocyte lead; Ery-Zn, erythrocyte zinc; Ery-Se, erythrocyte selenium; GW, gestational week; Hair Hg, hair mercury; Hair Se, hair selenium; HAZ,

## Online Supplemental Material

height-for-age z-score; HOME, quality and quantity of children's stimulation at home assessed using a modified version of Home Observation for Measurement of the Environment; NGO, non-governmental organization; SES, socioeconomic status assessed via a wealth index based on information on family ownership of e.g. assets, housing structure, and dwelling characteristics (Gwatkin DR et al. 2000); U-As, urinary arsenic; U-Cd, urinary cadmium; U-Pb, urinary lead; U-Se, urinary selenium.

<sup>a</sup> Mann-Whitney *U*-test, chi-squared, or Fisher's exact test

<sup>b</sup> GW8 corresponds to enrollment into MINIMat.

<sup>c</sup> Higher processing speed indicates faster response time

Online Supplemental Material

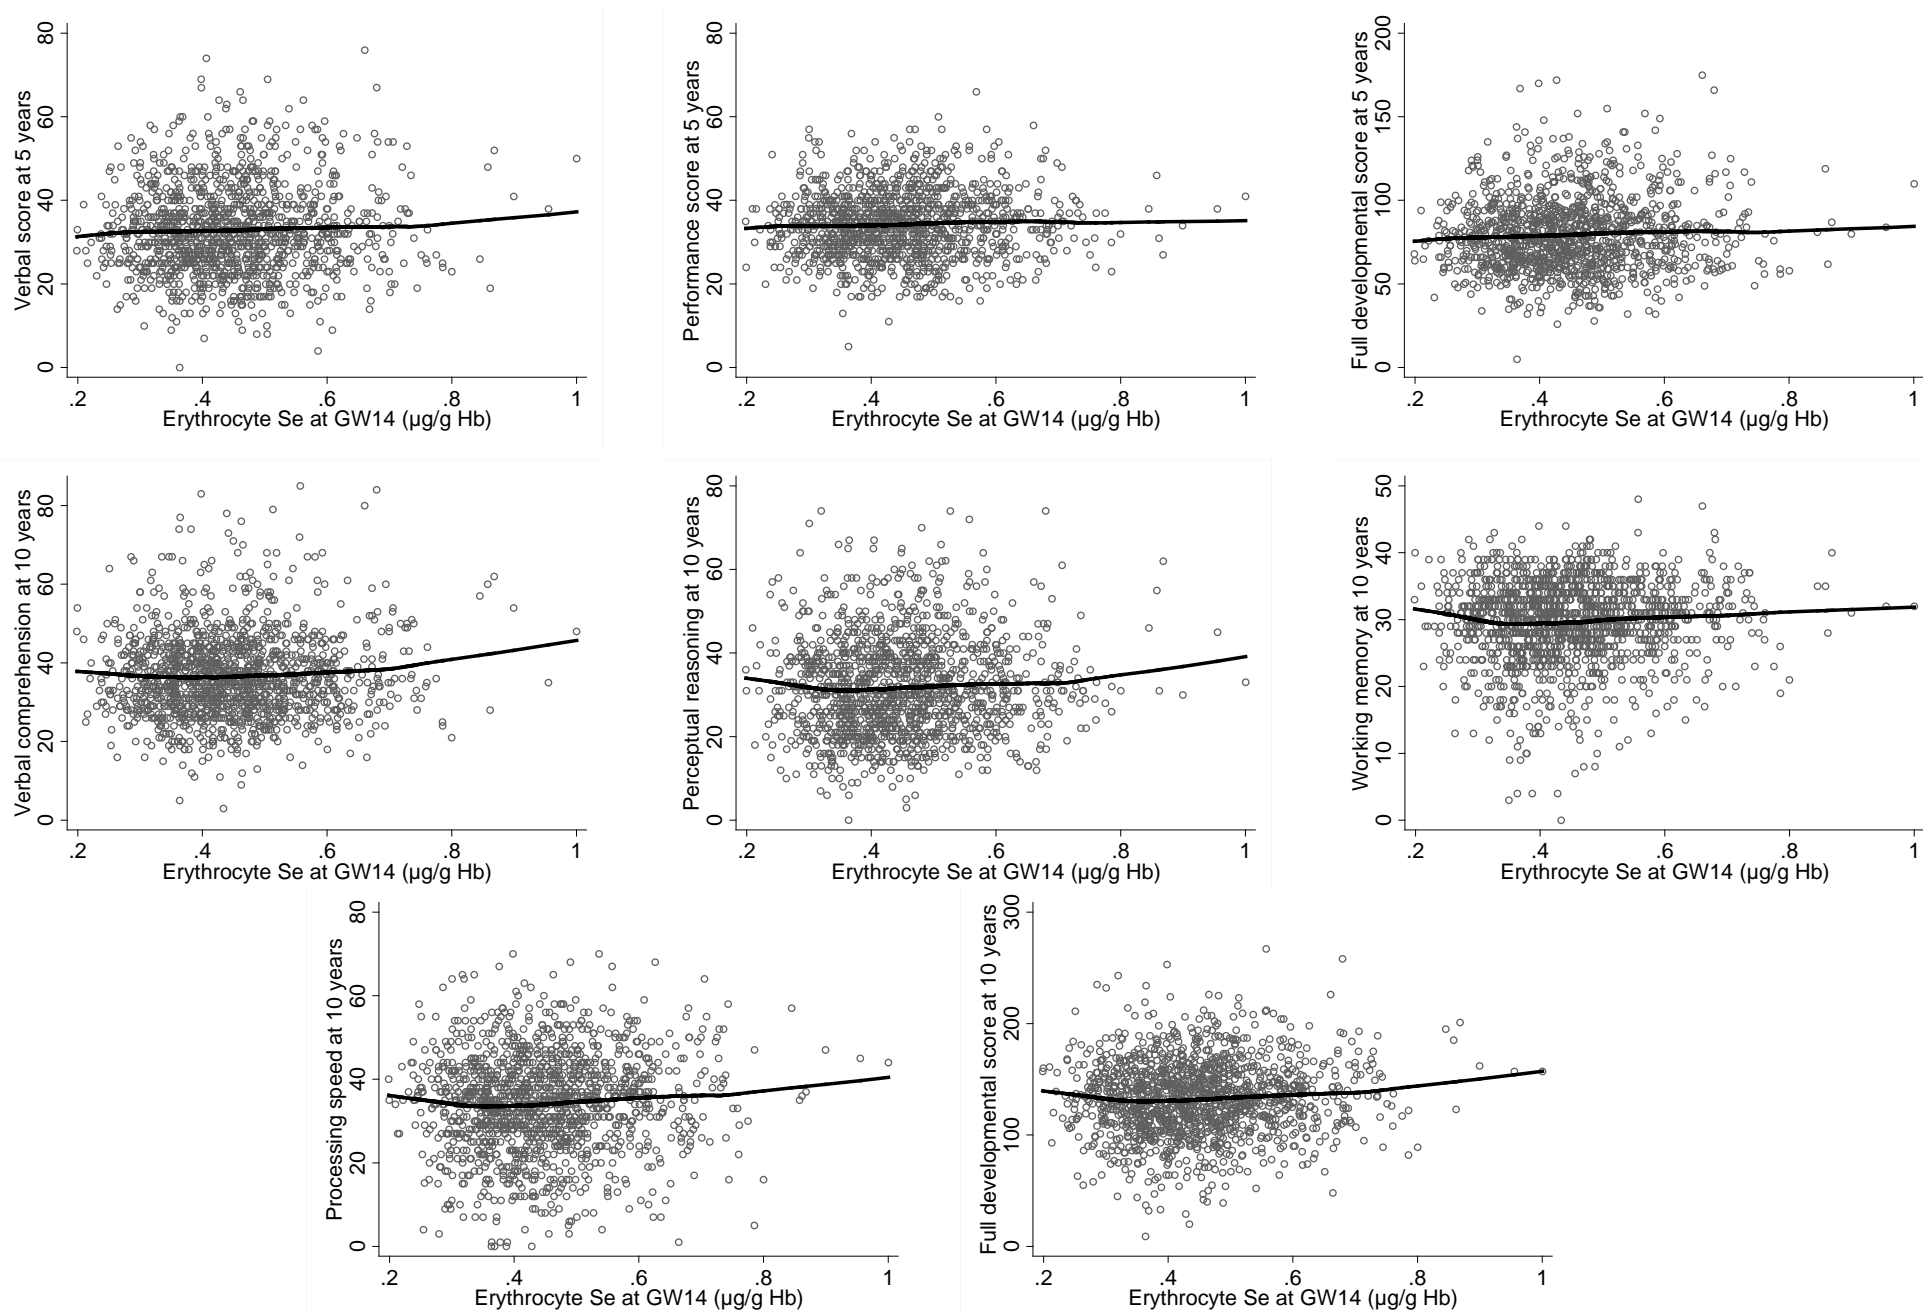

**Supplemental Figure S1.** Scatter plots with smoothed lowess lines for all outcomes at 5 and 10 years and erythrocyte selenium (Se; µg/g Hb) at gestational week 14.

Online Supplemental Material

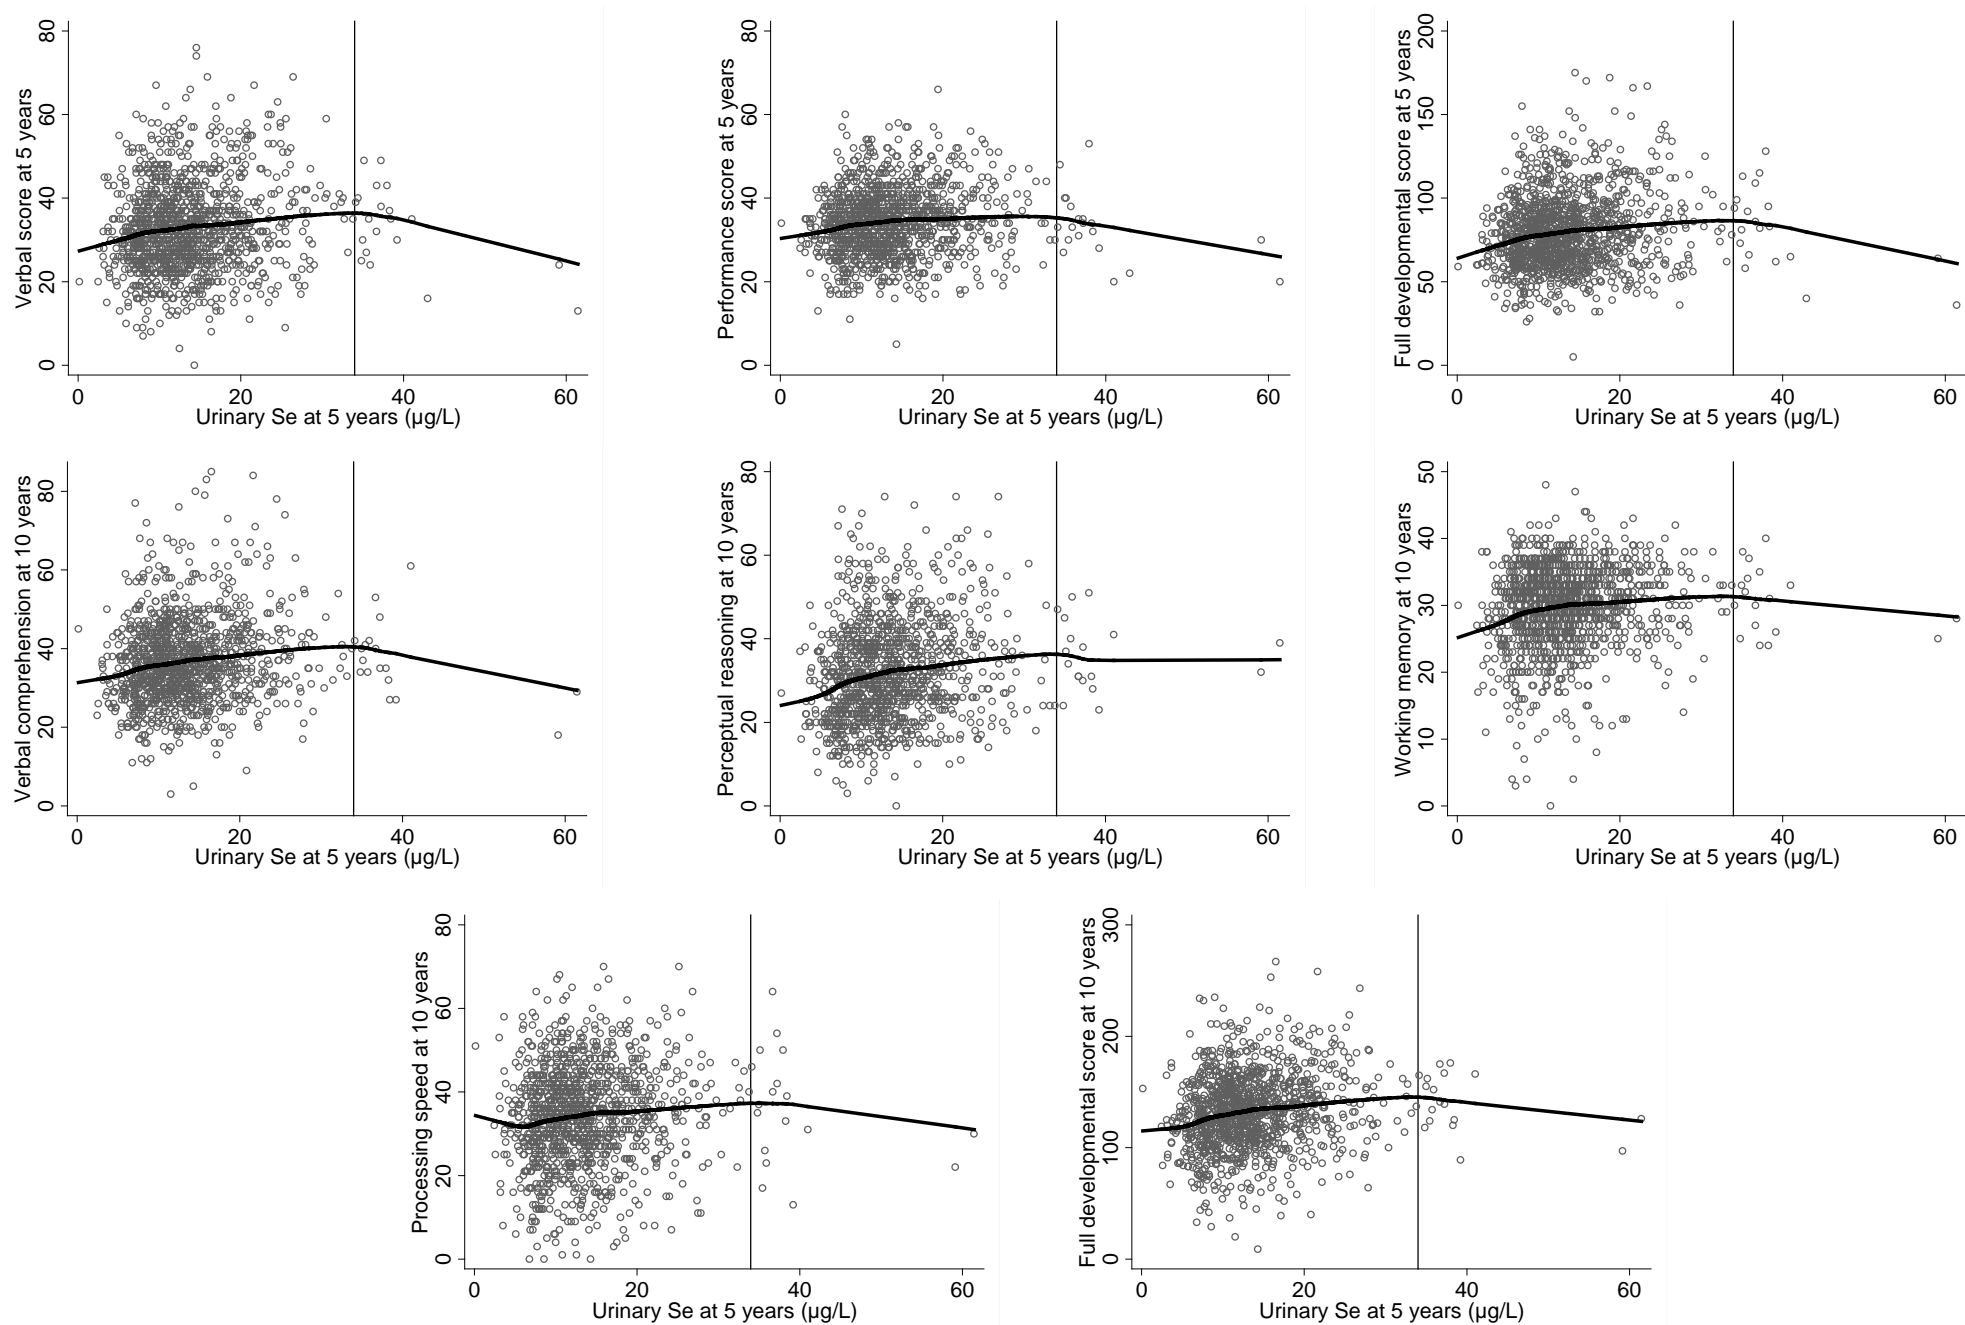

**Supplemental Figure S2.** Scatter plots with smoothed lowess lines for all outcomes at 5 and 10 years and urinary selenium (Se; µg/L) at 5 years. The vertical line at 34 µg/L represents the turning point used as the spline knot in the linear spline regression analyses.



Online Supplemental Material

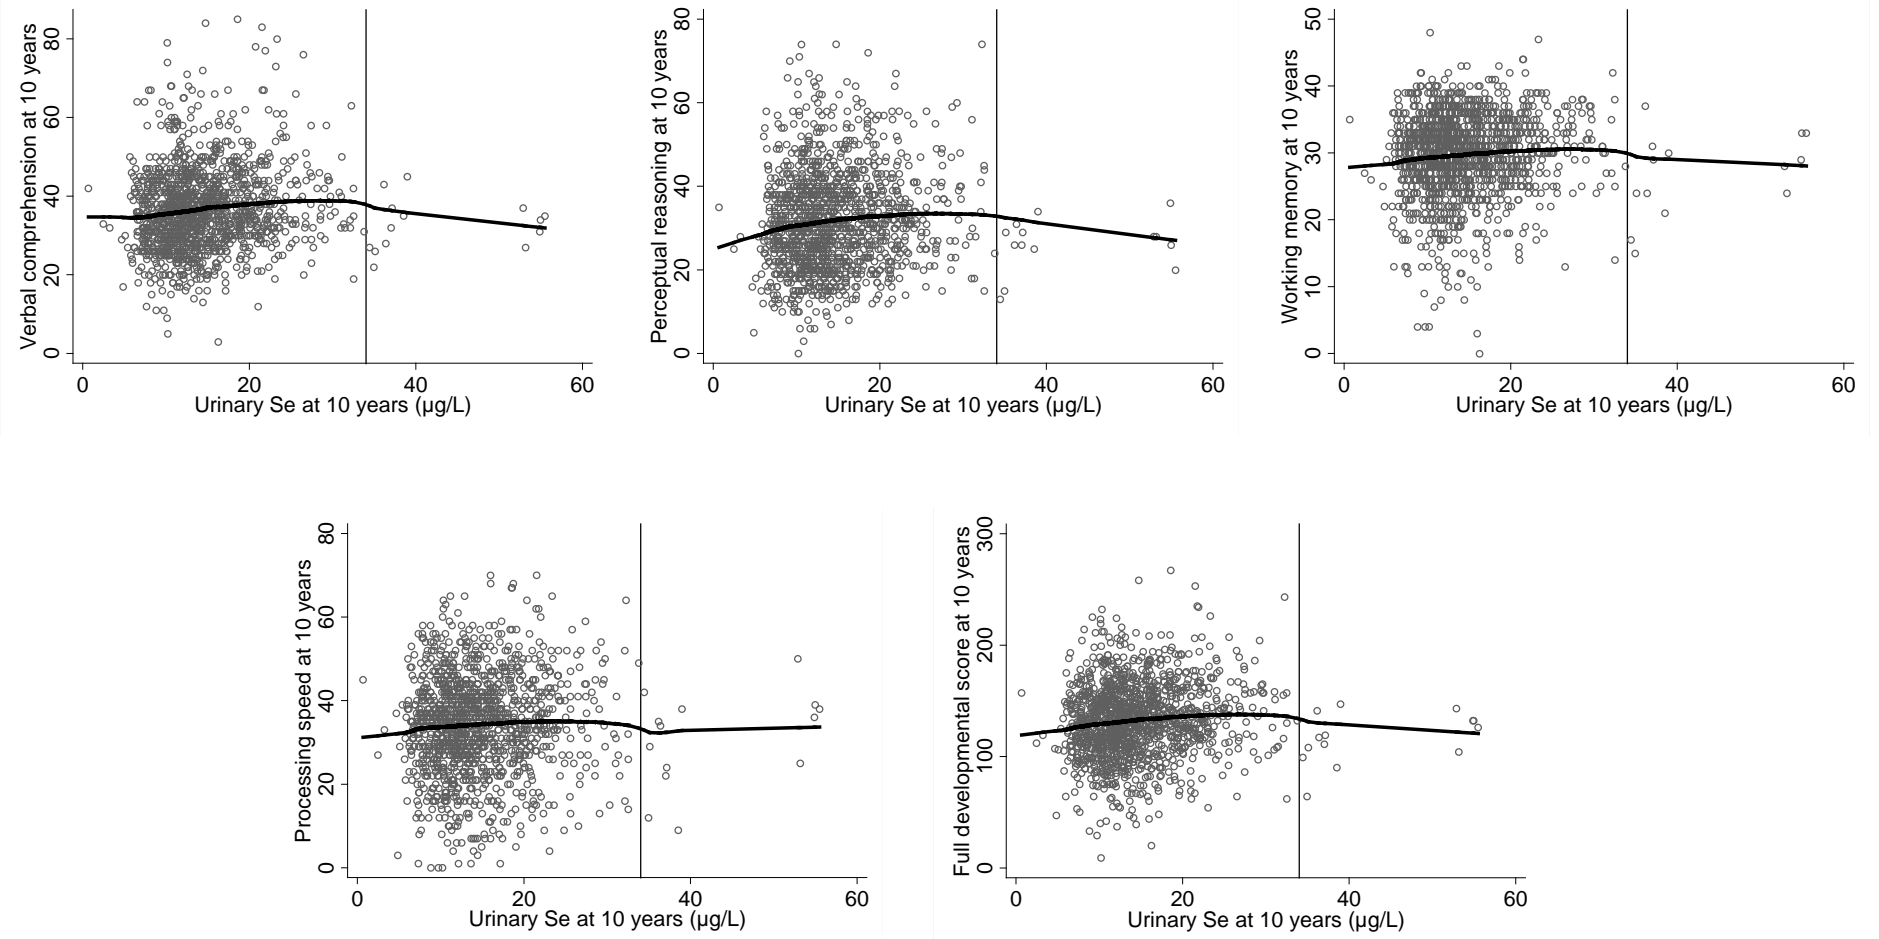

**Supplemental Figure S3.** Scatter plots with smoothed lowess lines for all outcomes at 10 years and urinary selenium (Se; µg/L) at 10 years. The vertical line at 34 µg/L represents the turning point used as the spline knot in the linear spline regression analyses.

Online Supplemental Material

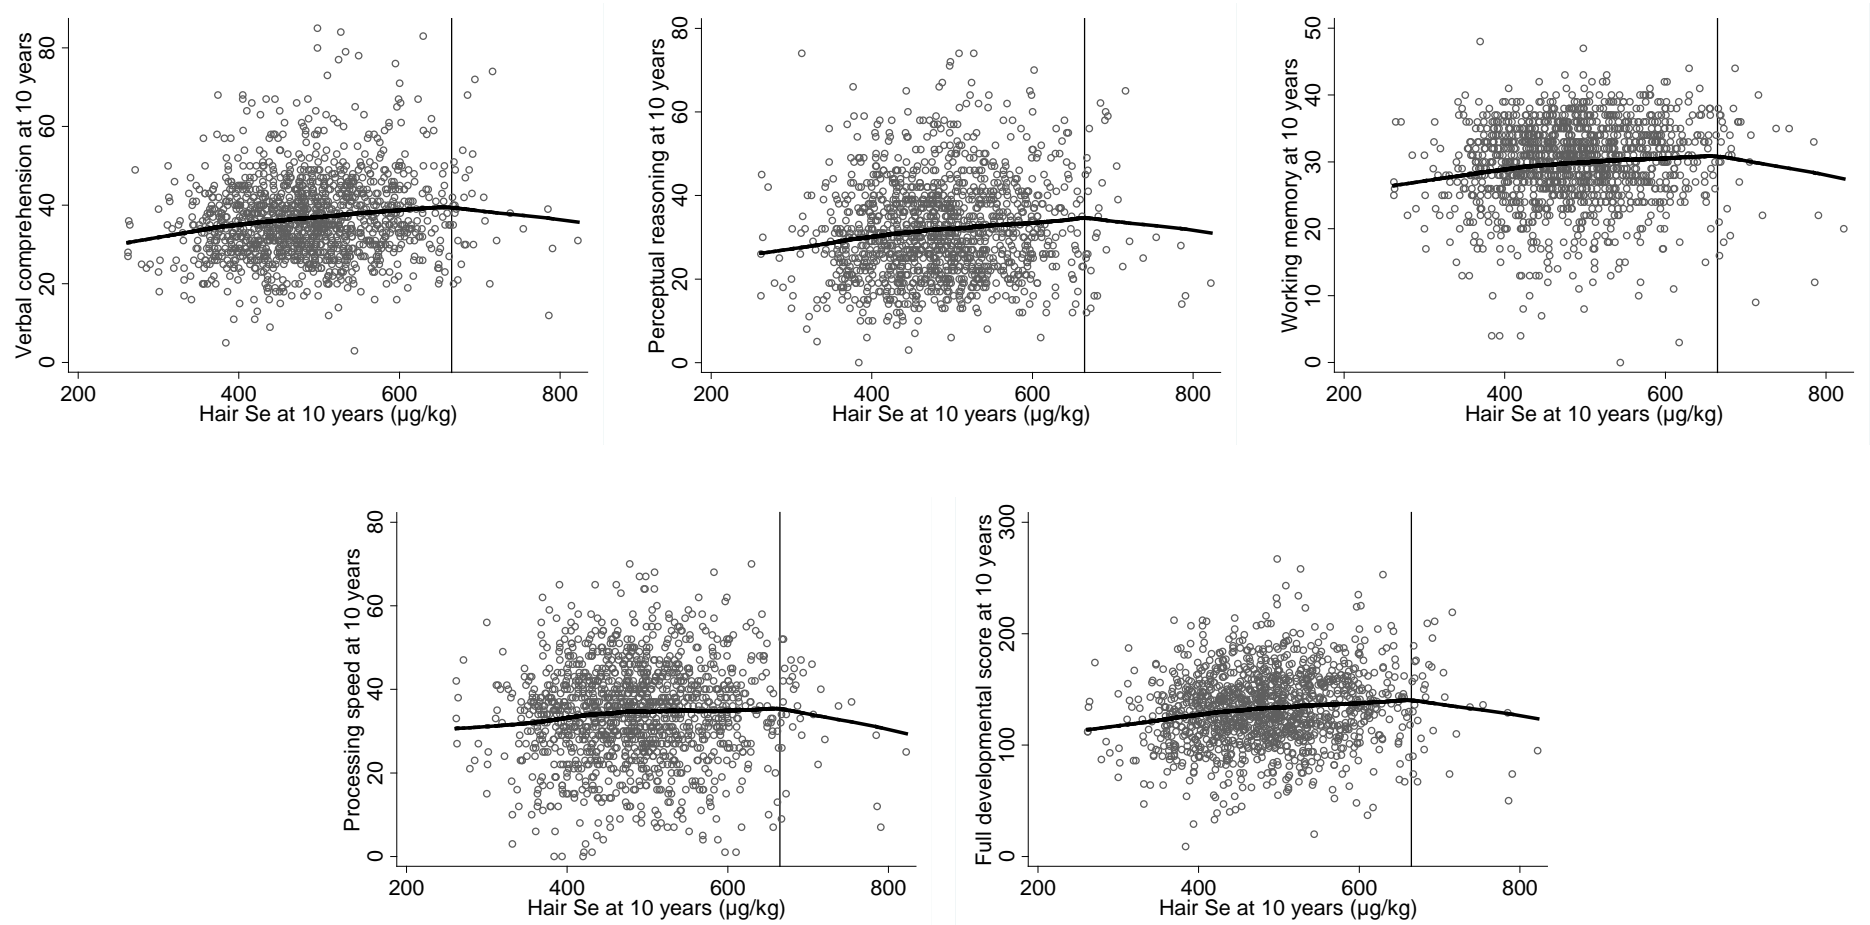

**Supplemental Figure S4.** Scatter plots with smoothed lowess lines for all outcomes at 10 years and hair selenium (Se;  $\mu\text{g/kg}$ ) at 10 years. The vertical line at 665  $\mu\text{g/kg}$  represents the turning point used as the spline knot in the linear spline regression analyses.

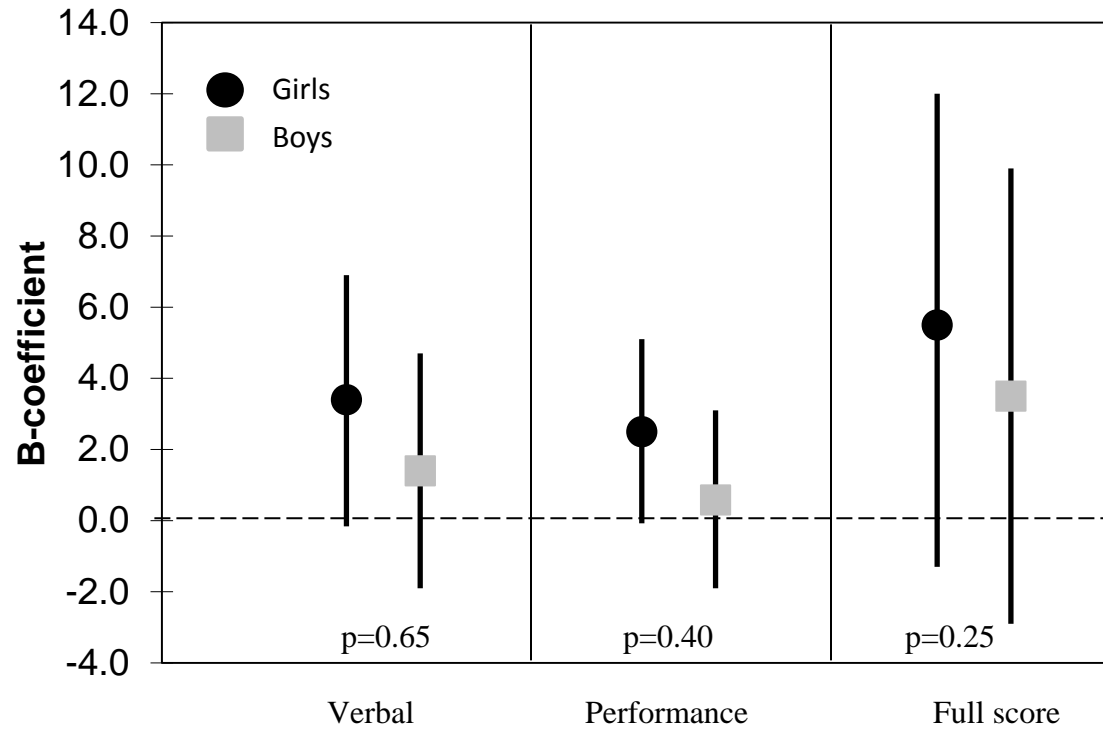

**Supplemental Figure S5.** Estimates (B-coefficient) and 95% CI (straight line) for associations between all outcomes at 5 years and erythrocyte selenium (per 0.5  $\mu\text{g/g}$  Hb) at gestational week 14, stratified by gender (n=608 girls and 652 boys). P-value for difference between estimates (Wald-test). Adjustments: parity and family SES at enrollment, birth weight, Hb at GW14, age at testing, HAZ, HOME, tester, school type, mothers' cognitive function, and paternal education (all assessed at 5 year follow-up).
